# Supplementary material for: A new mitochondria-targeted fluorescent probe for exogenous and endogenous superoxide anion imaging in living cells and pneumonia tissue
Source: Royal Society of Chemistry journal article supplement (doi:10.1039/d2an00690a), 2022-01-01
Supplement: d2an00690a1.pdf [file d2an00690a1.pdf]

## Supporting Information

### **A new mitochondria-targeted fluorescent probe for exogenous and endogenous superoxide anion imaging in living cells and pneumonia tissue**

Ya-Xi Ye<sup>a</sup>, Jian-Cheng Pan<sup>a</sup>, Xin-Yue Chen<sup>a</sup>, Li Jiang<sup>c</sup>, Qing-Cai Jiao<sup>a</sup>, Hai-Liang Zhu<sup>a,\*</sup>, Jun-Zhong Liu<sup>b,\*</sup>, Zhong-Chang Wang<sup>a,\*</sup>

<sup>a</sup>State Key Laboratory of Pharmaceutical Biotechnology and Institute of Artificial Intelligence Biomedicine, Nanjing University, Nanjing, 210023, PR China; <sup>b</sup>Nanjing Institute for Comprehensive Utilization of Wild Plants, CHINA CO-OP, 211111, Nanjing, China; <sup>c</sup>State Key Laboratory of Desert and Oasis Ecology, Xinjiang Institute of Ecology and Geography, Chinese Academy of Sciences, 830011, Urumqi, China

#### Contents

|                                                                             |                |
|-----------------------------------------------------------------------------|----------------|
| <sup>1</sup> H NMR spectra of <b>1</b> .....                                | <b>Fig. S1</b> |
| <sup>1</sup> H NMR spectra of <b>Mito-YX</b> .....                          | <b>Fig. S2</b> |
| <sup>13</sup> C NMR spectra of <b>Mito-YX</b> .....                         | <b>Fig. S3</b> |
| TOF-MS of <b>Mito-YX</b> .....                                              | <b>Fig. S4</b> |
| TOF-MS of the reaction product .....                                        | <b>Fig. S5</b> |
| <sup>1</sup> H NMR data of <b>Mito-YX</b> and corresponding compounds ..... | <b>Fig. S6</b> |
| HPLC chromatogram changes.....                                              | <b>Fig. S7</b> |
| The colocalization experiment.....                                          | <b>Fig. S8</b> |

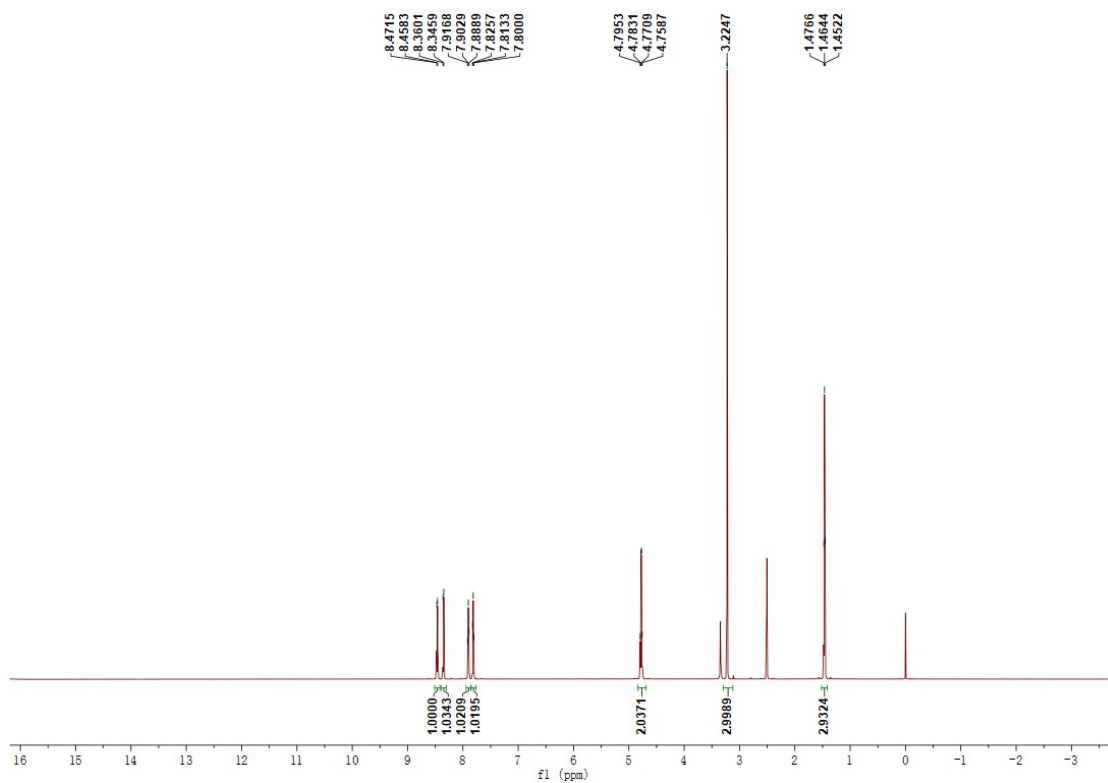

**Fig. S1.**  $^1\text{H}$  NMR spectra of **1** ( $\text{DMSO-}d_6$ ).

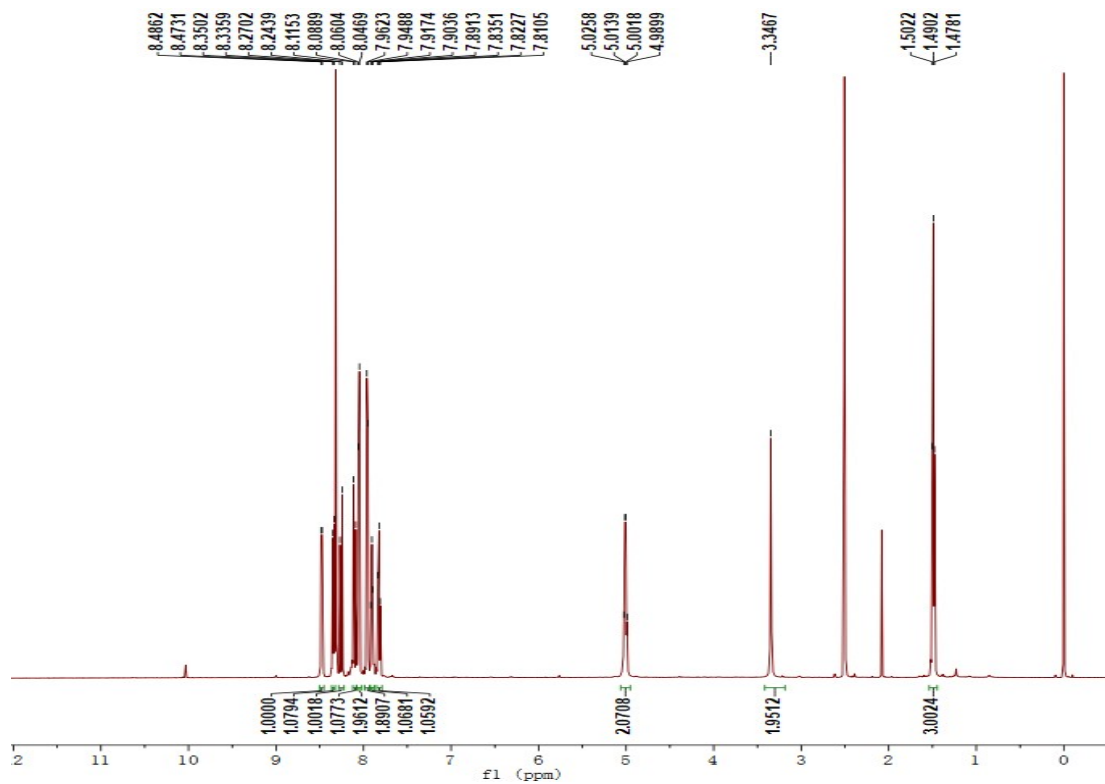

**Fig. S2.**  $^1\text{H}$  NMR spectra of Mito-YX ( $\text{DMSO-}d_6$ )

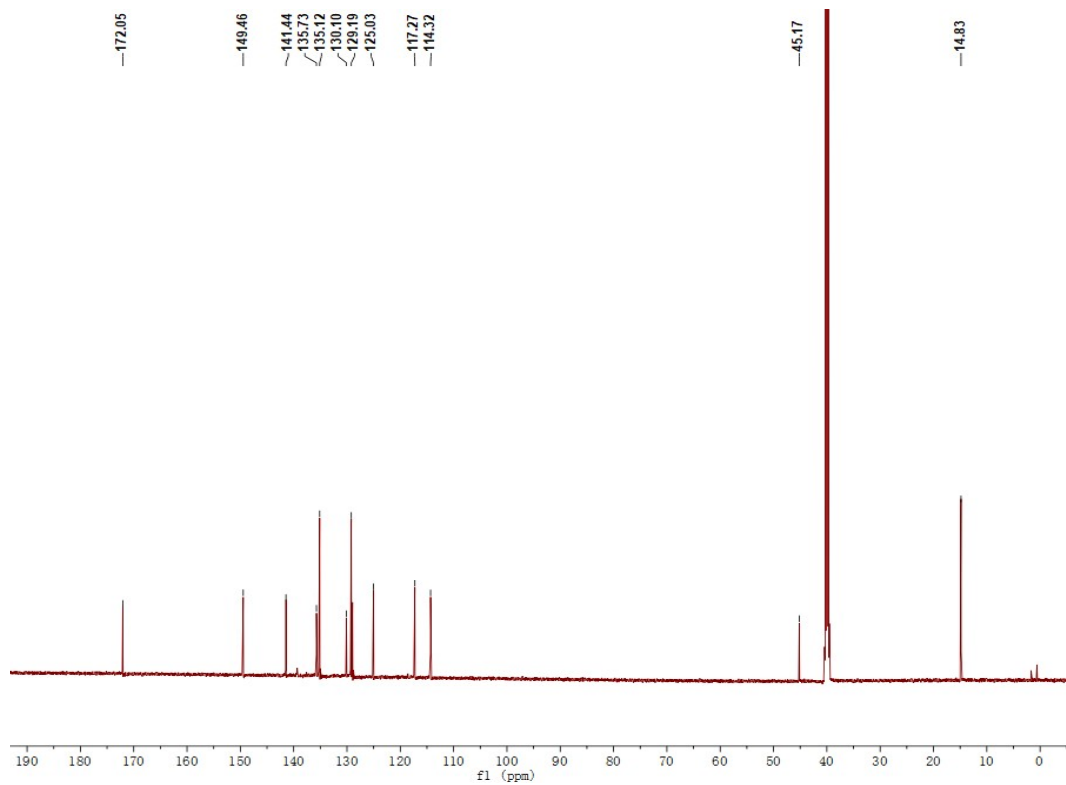

**Fig. S3.**  $^{13}\text{C}$  NMR spectra of Mito-YX ( $\text{DMSO-}d_6$ ).

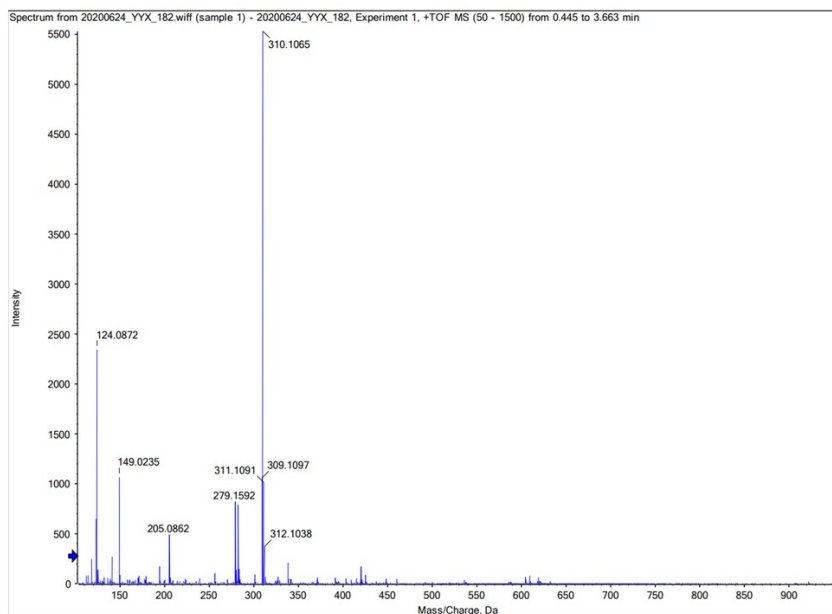

**Fig. S4.** TOF-MS of Mito-YX calculated for  $C_{17}H_{17}BNO_2S^+$   $[M]^+$ , 311.2; found, 311.1091.

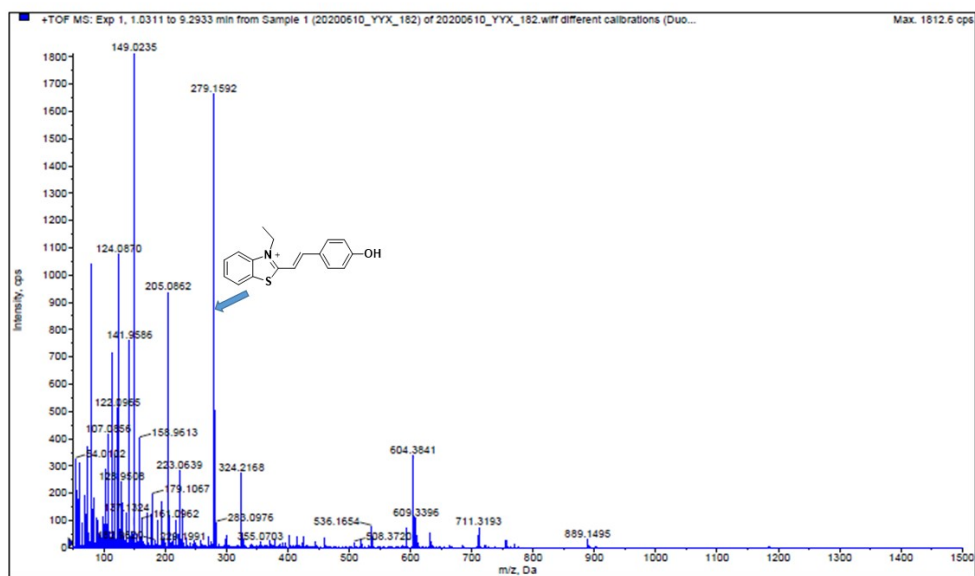

**Fig. S5.** TOF-MS of the reaction product of Mito-YX after treatment with  $O_2^{\bullet-}$ .

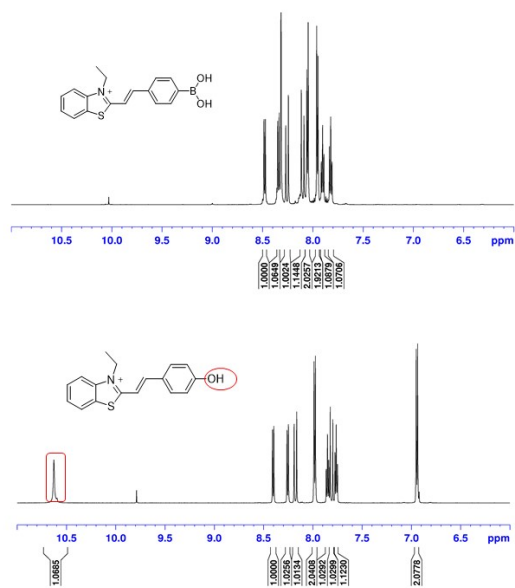

**Fig. S6.** <sup>1</sup>H NMR data of Mito-YX and corresponding compounds after reacting with O<sub>2</sub><sup>•-</sup>.

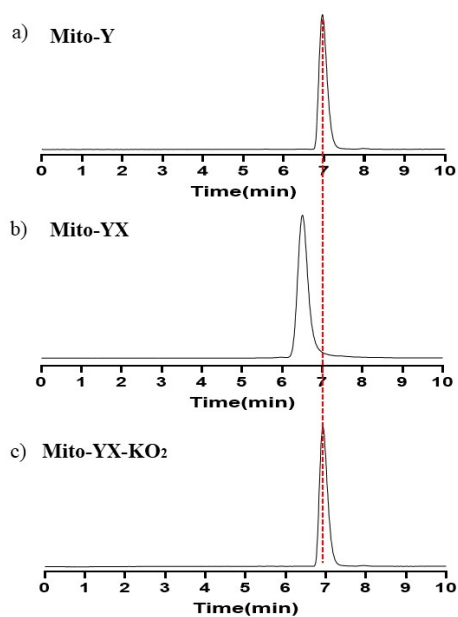

**Fig. S7.** HPLC chromatogram changes of 10  $\mu$ M Mito-Y (a) and 10  $\mu$ M Mito-YX in the absence (b) and presence (c) of 700  $\mu$ M KO<sub>2</sub>.

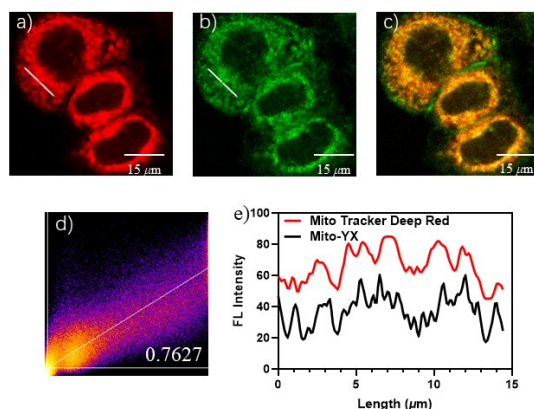

**Fig. S8.** CLSM images of MCF-7 cells co-cultured with (a) Mito Tracker Deep Red FM (100 nM, red channel); (b) **Mito-YX** (10  $\mu$ M, green channel, 100  $\mu$ M  $\text{KO}_2$ ). (c) Overlay image of (a), (b); (d) Intensity correlation plot of Mito Tracker Deep Red FM and **Mito-YX**,  $R^2 = 0.7627$ ; (e) Intensity profile of the linear ROI across the cell (white line in images panels b–c). green channel:  $\lambda_{em} = 530\text{-}600$  nm,  $\lambda_{ex} = 488$  nm; red channel:  $\lambda_{em} = 650\text{-}670$  nm,  $\lambda_{ex} = 644$  nm. Scale bar: 15  $\mu$ m.

The Fluorescent quantum yield of **Mito-Y** was studied in 20% ethanol solution using Rhodamine B ( $\Phi_s=0.89$  in ethanol) as a standard. The

Fluorescent quantum yields were determined based on the equation:

$$\Phi_u = \left[ \frac{(A_s F_u n^2)}{(A_u F_s n_0^2)} \right] \Phi_s$$

( $\Phi_u$  and  $\Phi_s$ : the fluorescent quantum yield of **Mito-Y** and Rhodamine B,  $A_u$  and  $A_s$ : the absorbance of **Mito-Y** and Rhodamine B respectively,  $F_u$  and  $F_s$ : the integrated fluorescence intensity of **Mito-Y** and Rhodamine B at their excitation wavelength, n presents the refractive index of solvent. The fluorescent quantum yield of **Mito-Y** is 0.23.

$\Phi_s=0.89$ ,  $A_s=0.249$ ,  $F_s=122297.444$ ,  $n_0=1.33$ ;  $A_u=0.131$ ,  $F_u=17356.607$ ,  $n=1.365$ ; calculated  $\Phi_u=0.23$ .

**Table.1** The comparison of reported work with this work

| Probe                                                                               | Targeting effect | Ex/Em (nm)                                         | $\delta$ | LOD          | Time    | Application                                               | ref |
|-------------------------------------------------------------------------------------|------------------|----------------------------------------------------|----------|--------------|---------|-----------------------------------------------------------|-----|
| 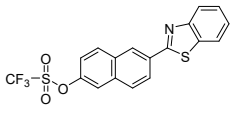   | No               | $\lambda_{ex}=365/720$ nm; $\lambda_{em}=500$ nm   | /        | 1 nM         | 5 min   | in buffer, living cells and tissues.                      | [1] |
|    | mitochondrion    | $\lambda_{ex} = 490$ nm; $\lambda_{em}=652/545$ nm | /        | 20.5 nM      | 3 min   | in buffer, living cells, LPS-induced mice                 | [2] |
|   | No               | $\lambda_{ex}=345/740$ nm; $\lambda_{em}=470$ nm   | /        | 150 nM       | 25 min  | in buffer, living cells and fresh rat hippocampal tissues | [3] |
|  | mitochondrion    | $\lambda_{ex}= 494$ nm, $\lambda_{em}=520$ nm      | /        | 0.65 $\mu$ M | < 5 min | in buffer, living cells                                   | [4] |
|  | mitochondrion    | $\lambda_{ex}= 660$ nm, $\lambda_{em}=719$ nm      | 0.55     | 0.24 $\mu$ M | /       | in buffer, living cells and drug-induced AKI mouse        | [5] |
|  | No               | $\lambda_{ex}= 505$ nm, $\lambda_{em}=526$ nm      | /        | 4.42 $\mu$ M | 40 min  | in buffer and living cells                                | [6] |
|  | mitochondrion    | $\lambda_{ex}= 415$ nm, $\lambda_{em}=540/475$ nm  | /        | 0.37 $\mu$ M | 132 s   | in buffer, living cells and inflammatory Daphnia magna    | [7] |
|  | No               | $\lambda_{ex}= 430/820$ nm, $\lambda_{em}=550$ nm  | 0.19     | 13 nM        | 100 s   | in buffer, living cells, zebrafish and inflammatory       | [8] |

|                                                                                     |                       |                                                                    |                                       |                       |           |                                                                        |           |
|-------------------------------------------------------------------------------------|-----------------------|--------------------------------------------------------------------|---------------------------------------|-----------------------|-----------|------------------------------------------------------------------------|-----------|
| 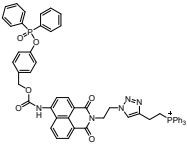   | mitochondrion         | $\lambda_{ex}=410\text{ nm}$ ,<br>$\lambda_{em}=540/475\text{ nm}$ | EtOH:0.924<br>DMSO:0.791<br>PBS:0.497 | /                     | 5 min     | in buffer,<br>living cells,<br>and<br>inflammator<br>y mice            | [9]       |
|    | lysosome              | $\lambda_{ex}=450/730\text{ nm}$ ,<br>$\lambda_{em}=556\text{ nm}$ | /                                     | 0.047<br>nM           | 60<br>min | in buffer,<br>living cells,<br>zebrafish<br>and<br>pneumonia<br>tissue | [10]      |
|    | mitochondrion         | $\lambda_{ex}=418\text{ nm}$ ,<br>$\lambda_{em}=635\text{ nm}$     | /                                     | 22.2<br>nM            | 20<br>min | in buffer<br>and living<br>cells                                       | [11]      |
|   | No                    | $\lambda_{ex}=580/800\text{ nm}$ ,<br>$\lambda_{em}=638\text{ nm}$ | /                                     | 2.09<br>$\mu\text{M}$ | 150 s     | in buffer,<br>living cells<br>and diabetic<br>mice                     | [12]      |
|  | mitochondrion         | $\lambda_{ex}=500\text{ nm}$ ,<br>$\lambda_{em}=645\text{ nm}$     | /                                     | 10<br>nM              | /         | in buffer<br>and living<br>cells                                       | [13]      |
|  | endoplasmic reticulum | $\lambda_{ex}=500/800\text{ nm}$ ,<br>$\lambda_{em}=558\text{ nm}$ | 0.41                                  | 0.12<br>$\mu\text{M}$ | 6 min     | in buffer,<br>living cells<br>and<br>zebrafish                         | [14]      |
|  | mitochondrion         | $\lambda_{ex}=483/800\text{ nm}$ ,<br>$\lambda_{em}=512\text{ nm}$ | 0.1                                   | 9.5<br>nM             | /         | in buffer,<br>living cells<br>and<br>inflammator<br>y mice             | [15]      |
|  | mitochondrion         | $\lambda_{ex}=482\text{ nm}$ ,<br>$\lambda_{em}=565\text{ nm}$     | 0.23                                  | 0.24<br>nM            | 4 min     | in buffer,<br>living cells<br>and<br>pneumonia<br>tissue               | This work |

[1] D. Lu, L. Zhou, R. Wang, X.B. Zhang, L. He, J. Zhang, X. Hu, W. Tan, A two-photon fluorescent probe for endogenous superoxide anion radical detection and imaging in living cells and tissues, *Sensor Actuat B-Chem.* 250 (2017) 259-266.



- [2] J. Wang, L. Liu, W. Xu, Z. Yang, Y. Yan, X. Xie, Y. Wang, T. Yi, C. Wang, J. Hua, Mitochondria-targeted Ratiometric Fluorescent Probe Based on Diketopyrrolopyrrole for Detecting and Imaging of Endogenous Superoxide Anion in Vitro and in Vivo, *Anal. Chem.* 91 (2019), 5786-5793.
- [3] L. Chen, M.K. Cho, D. Wu, H.M. Kim, J. Yoon, Two-Photon Fluorescence Probe for Selective Monitoring of Superoxide in Live Cells and Tissues, *Anal. Chem.* 91 (2019), 14691-14696.
- [4] Fang, Si, Yang, Liu, Kelu, Yan, Wenwan, Zhong, A mitochondrion targeting fluorescent probe for imaging of intracellular superoxide radicals, *Chem. Commun.* 51 (2015), 7931-7934.
- [5] Y. Lv, D. Cheng, D. Su, M. Chen, B.-C. Yin, L. Yuan, X.-B. Zhang, Visualization of oxidative injury in the mouse kidney using selective superoxide anion fluorescent probes, *Chem. Sci.* 9 (2018) 7606-7613.
- [6] A. Ppd, B. An, B. Skm, A. Stm, Phenylselenyl containing turn-on dibodipy probe for selective detection of superoxide in mammalian breast cancer cell line - ScienceDirect, *Sensor Actuat B-Chem.* 281 (2019) 8-13.
- [7] Z. Zhang, J. Fan, Y. Zhao, Y. Kang, J. Du, X. Peng, Mitochondria-Accessing Ratiometric Fluorescent Probe for Imaging Endogenous Superoxide Anion in Live Cells and *Daphnia magna*, *Acs Sensors* 3 (2018) 735-741.
- [8] R.Q. Li, Z.Q. Mao, L. Rong, N. Wu, Z.H. Liu, A Two-Photon Fluorescent Probe for Exogenous and Endogenous Superoxide Anion Imaging in vitro and in vivo, *Biosens. Bioelectron.* 87 (2017) 73-80.
- [9] Z.A. Ning, H.A. Yun, A. Qt, B. Yw, Z.A. Qiang, H.A. Ping, A mitochondrial targeting two-channel responsive fluorescence probe for imaging the superoxide radical anion in vitro and in vivo, *Talanta* 194 (2019) 79-85.
- [10] S. Ma, Y. Ma, Q. Liu, W. Lin, A two-photon fluorescent probe with lysosome targetability for imaging endogenous superoxide anion in living cells, zebrafish and pneumonia tissue, *Sensor Actuat B-Chem.* 332 (2021) 129523.
- [11] A. Cx, C. Wxb, A. Zy, A. Sl, W. Yu, A. Jh, A turn-on mitochondria-targeted near-infrared fluorescent probe with a large Stokes shift for detecting and imaging endogenous superoxide anion in cells, *J. Photoch. Photobio. A* 415 (2021), 113304.
- [12] W. Song, B. Dong, Y. Lu, Z. Li, W. Lin, Two-photon Fluorescent Sensors for Visual Detection of Abnormal Superoxide Anion in Diabetes Mice, *Sensor Actuat B-Chem.* 332 (2021) 129537.
- [13] J.A. Shan, A. Jz, Y.B. Si, A. Xm, A highly responsive, sensitive NIR fluorescent probe for imaging of superoxide anion in mitochondria of oral cancer cells, *Talanta* 222 (2021), 121566.
- [14] Y. Lu, R. Wang, Y. Sun, M. Tian, B. Dong, Endoplasmic reticulum-specific fluorescent probe for the two-photon imaging of endogenous superoxide anion ( $O_2^{\cdot-}$ ) in live cells and zebrafishes, *Talanta* 225 (2020) 122020.
- [15] L. Ping, Z. Wen, K. Li, L. Xiao, T. Bo, Mitochondria-Targeted Reaction-Based Two-Photon Fluorescent Probe for Imaging of Superoxide Anion in Live Cells and in Vivo, *Anal. Chem.* 85 (2013) 9877-9881.
